# Supplementary material for: LEA motifs promote desiccation tolerance in vivo
Source: PubMed Central journal article supplement (PMC8670023; doi:10.1186/s12915-021-01176-0), 2021-12-14
Supplement: 12915_2021_1176_MOESM1_ESM.pdf [file 12915_2021_1176_MOESM1_ESM.pdf]

## **Additional File 1**

### **LEA motifs promote desiccation tolerance *in vivo***

Jonathan D. Hibshman<sup>a</sup> and Bob Goldstein<sup>a,b</sup>

<sup>a</sup>Biology Department, University of North Carolina at Chapel Hill, Chapel Hill, NC, USA

<sup>b</sup>Lineberger Comprehensive Cancer Center, University of North Carolina at Chapel Hill, Chapel Hill, NC, USA

\*Corresponding author, Jonathan D. Hibshman

Biology Department

616 Fordham Hall

The University of North Carolina at Chapel Hill

Chapel Hill, NC 27599-3280

E-mail: [hibsjo01@email.unc.edu](mailto:hibsjo01@email.unc.edu)

Figure S1

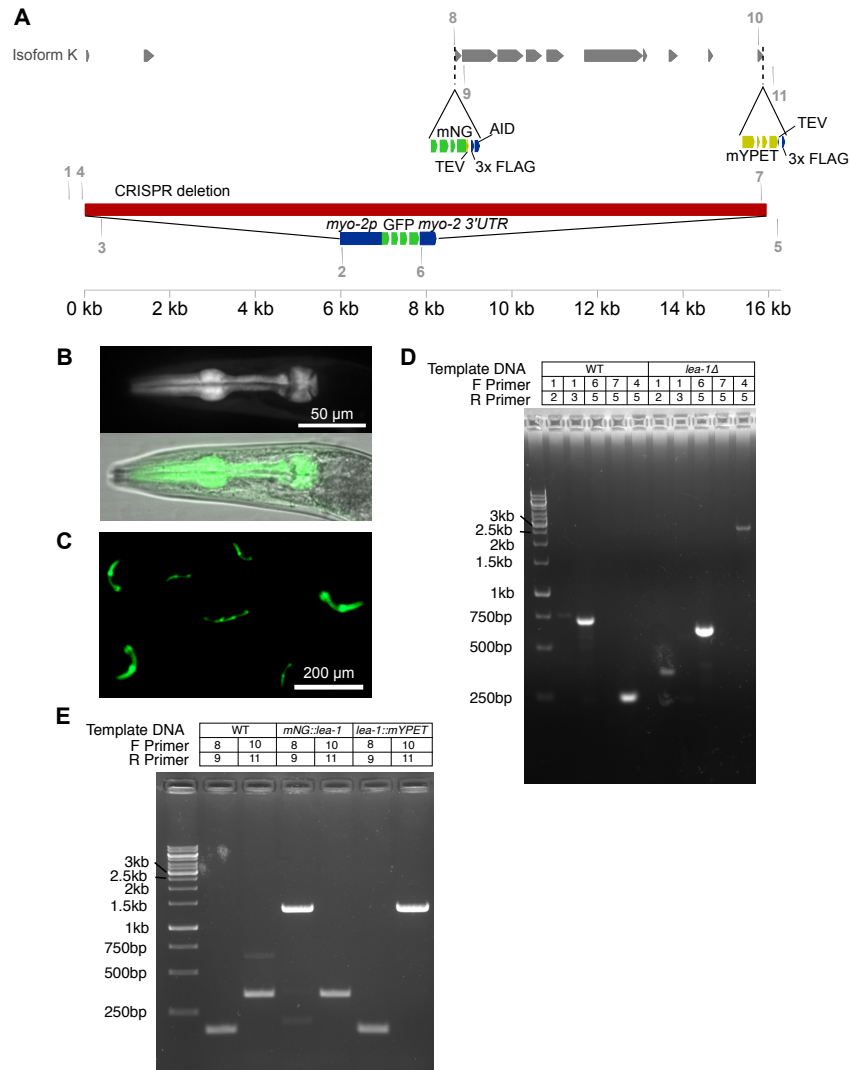

**Additional File 1: Figure S1.** Genotyping *LEA-1* alleles. **A)** A simplified schematic depicting locations of primers to genotype the various genome edits. Primers are indicated with numbers. Sequences can be found in Table S1. **B)** A representative image depicts pharyngeal GFP expression in an *lea-1Δ* mutant in which 15.8 kb of genomic sequence was replaced with *myo-2p::GFP::myo-2 3'UTR* as a visual marker for the deletion. **C)** A representative image shows the plate level phenotype of pharyngeal GFP expression in *lea-1Δ* mutants. **D)** Primers as indicated by numbers in Figure 1 were used to amplify genomic DNA and confirm deletion of the endogenous *lea-1* locus and insertion of *myo-2p::GFP::myo-2 3'UTR* in the *lea-1Δ* mutant. **E)** The indicated primers were used to amplify across the loci in genomic DNA at which the mNG and mYPET tags were inserted. Genotyping confirms insertion of the mNG::3xFLAG::AID tag in a relatively N-terminal position of *lea-1* and insertion of the mYPET::3xFLAG tag at the C-terminus of the gene.

Figure S2

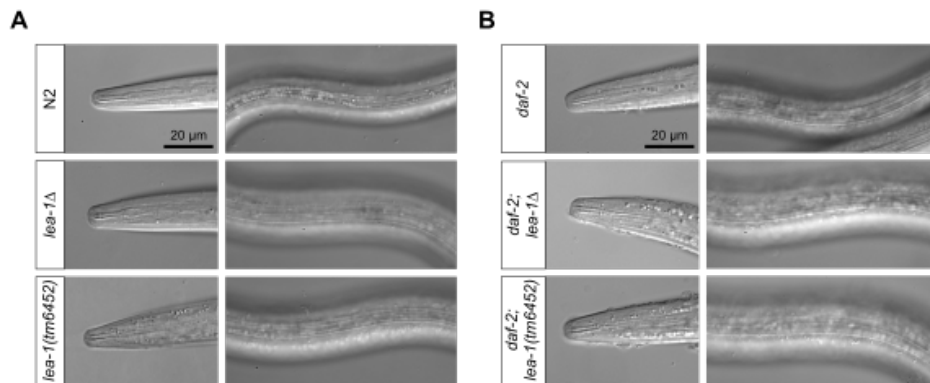

**Additional File 1: Figure S2.** Representative images of dauer-like larvae of *lea-1* mutants. **A)** The mouth and alae of N2, *lea-1Δ*, and *lea-1(tm6452)* worms are shown. **B)** The mouth and alae of *daf-2*, *daf-2; lea-1Δ*, and *daf-2; lea-1(tm6452)* worms are shown. Dauer-like larvae were formed at 25 °C in both A and B.

Figure S3

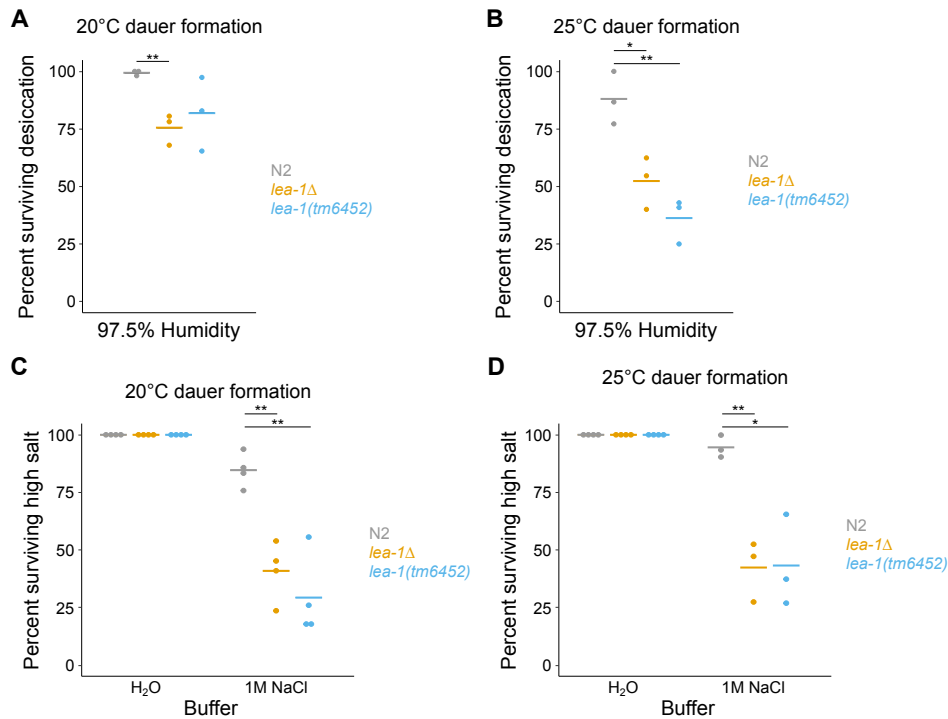

**Additional File 1: Figure S3.** Mutations in *lea-1* impact wild-type worms (N2) similarly to *daf-2* mutants. **A)** *lea-1Δ* dauer larvae formed at 20 °C had reduced desiccation survival at 97.5% RH ( $p=0.003$ , unpaired T-test vs. N2,  $n=3$ ). Desiccation survival of *lea-1(tm6452)* mutants was statistically indistinguishable from N2 ( $p=0.13$ , unpaired T-test,  $n=3$ ). **B)** Both *lea-1Δ* and *lea-1(tm6452)* dauer-like larvae formed at 25 °C have reduced desiccation survival at 97.5% RH ( $p=0.02$ ,  $p=0.004$  respectively, unpaired T-tests vs. N2,  $n=3$ ). **C)** *lea-1Δ* and *lea-1(tm6452)* dauer larvae formed at 20 °C have reduced survival in 1M NaCl for 2 hr ( $p=0.001$ ,  $p=0.001$ , unpaired T-tests vs. N2,  $n=4$ ). **D)** *lea-1Δ* and *lea-1(tm6452)* dauer-like larvae formed at 25 °C have reduced survival in 1M NaCl for 2 hr ( $p=0.003$ ,  $p=0.01$  respectively, unpaired T-tests vs. N2,  $n=3$ ).

Figure S4

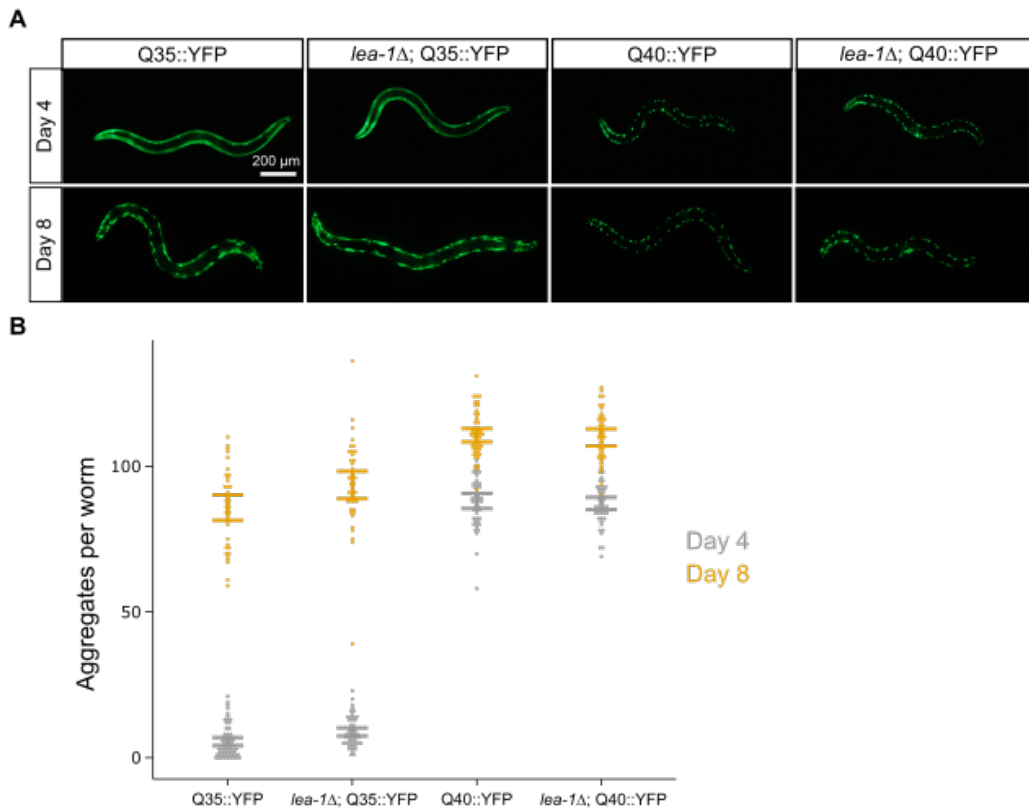

**Additional File 1: Figure S4.** LEA-1 does not significantly alter polyglutamine protein aggregation due to age. **A)** Representative images of 4 and 8 day old worms expressing polyglutamine::YFP constructs in body wall muscle. **B)** There are no significant differences in the number of polyglutamine aggregates between control (N2 background) and *lea-1Δ* animals for either Q35::YFP (day 4  $p=0.23$ , day 8  $p=0.42$ ,  $n=3$ , unpaired T-test) or Q40::YFP (day 4  $p=0.81$ , day 8  $p=0.32$ ,  $n=3$ , unpaired T-test).

Figure S5

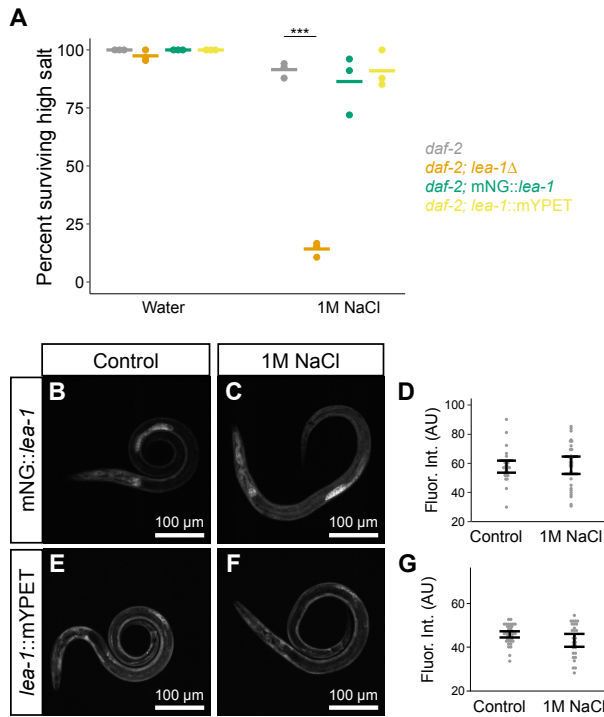

**Additional File 1: Figure S5.** LEA-1 expression does not increase in response to short-term osmotic stress. **A)** Fluorescent tags do not disrupt function of LEA-1 during osmotic stress. Survival is plotted for worms exposed to either water or 1M NaCl for 2 hr. Bars represent mean survival. Neither *daf-2; mNG::lea-1* nor *daf-2; lea-1::mYPET* worms were significantly different from control *daf-2* worms exposed to 1M NaCl. **B)** Representative image of a control *daf-2; mNG::lea-1* dauer worm. **D)** A *daf-2; mNG::lea-1* dauer larvae exposed to 1M NaCl for 2 hr. **E)** mNG fluorescence is not significantly altered in worms exposed to 1M NaCl relative to controls ( $p=0.86$ ,  $n=3$  replicates, unpaired T-test). **F)** A representative *daf-2* dauer worm expressing *lea-1::mYPET*. **G)** A *daf-2; lea-1::mYPET* dauer after 2 hr in 1M NaCl. **H)** Fluorescent intensity is not significantly different between control worms expressing *lea-1::mYPET* ( $p=0.36$ ,  $n=3$  replicates, unpaired T-test). \*\*\* indicates  $p<0.001$ .

Figure S6

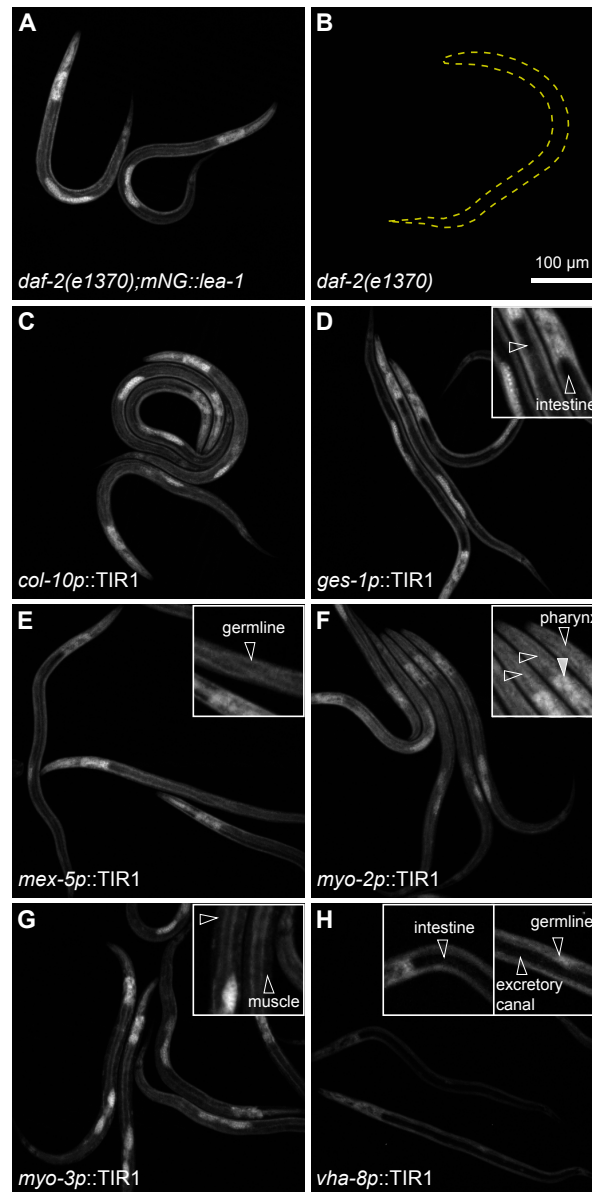

**Additional File 1: Figure S6.** Representative images of auxin-induced depletion of mNG::*lea-1* in TIR1 expressing strains. **A)** Baseline expression of mNG::LEA-1 in the absence of TIR1 expression. **B)** *daf-2* mutant animals have no detectable baseline fluorescence. Yellow dashed lines indicate the outline of a worm. **C)** TIR1 expressed from the *col-10* promoter should deplete LEA-1 in the hypodermis. It had a minimal effect on expression levels in worms. **D)** TIR1 driven by the *ges-1* promoter reduced LEA-1 in the intestine. **E)** TIR1 under the control of the *mex-5* promoter depleted LEA-1 in the germline. Some worms retained a significantly reduced amount of germline LEA-1. **F)** *myo-2p::TIR1* worms have reduced LEA-1 in the pharynx. This construct did not totally deplete LEA-1. In particular, expression levels are still relatively high in the

posterior bulb of the pharynx (solid arrowhead). Depletion in the more anterior regions of the pharynx was more pronounced (open arrowheads). **G)** Expression of *myo-3p::TIR1* significantly reduced LEA-1 levels in body wall muscle. **H)** TIR1 driven by the *vha-8* promoter is expressed in multiple tissues and depletes LEA-1 in the excretory cell (and canal), intestine, and germline. TIR-1 expression was also observed in hypodermis and some cells of the head. The 100  $\mu$ m scale bar applies to all images. All images were taken with the same microscope settings and are shown on the same intensity scale. For the 2x magnified insets the brightness was adjusted to facilitate visualization. All worms were grown on plates containing 1mM auxin. Open arrowheads indicate sites of LEA-1 depletion in each strain.



Figure S7

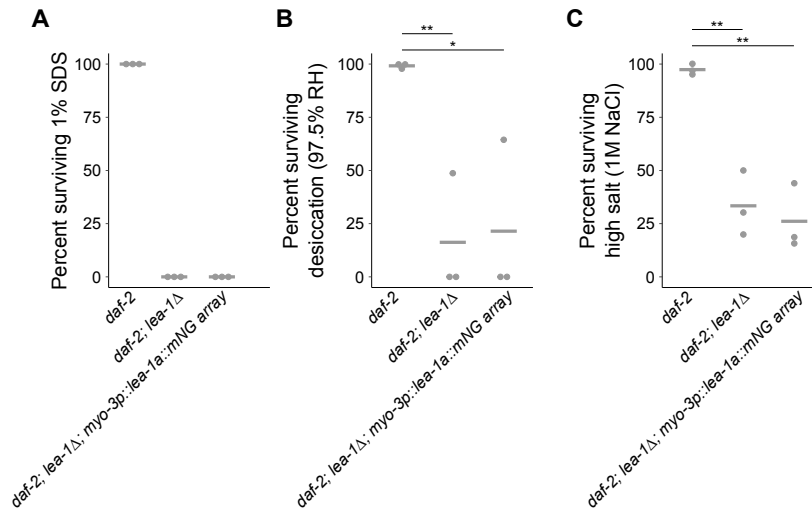

**Additional File 1: Figure S7.** Overexpression of *lea-1a* in body wall muscle does not rescue SDS sensitivity, desiccation tolerance, or osmotic stress resistance. **A)** Expression of mNG-tagged *lea-1a* in body wall muscle (*myo-3p::lea-1a::mNG*) does not increase 1% SDS survival of dauer-like larvae formed at 25 °C. **B)** Body wall expression of mNG-tagged *lea-1a* does not improve desiccation survival at 97.5% RH. *daf-2;lea-1Δ* and *myo-3p::lea-1a::mNG* worms each have reduced desiccation survival at 97.5% RH relative to *daf-2* controls (p=0.007, p=0.02, respectively, n=3, unpaired T-test) **C)** Survival of osmotic stress in 1M NaCl for 2 hr is not improved by expression of *myo-3p::lea-1a::mNG*. Both *daf-2;lea-1Δ* and *myo-3p::lea-1a::mNG* worms are sensitive to 1M NaCl (p=0.002, p=0.001 respectively vs. *daf-2*, n=3, unpaired T-test). \* indicates p<0.05, \*\* indicates p<0.01.

Figure S8

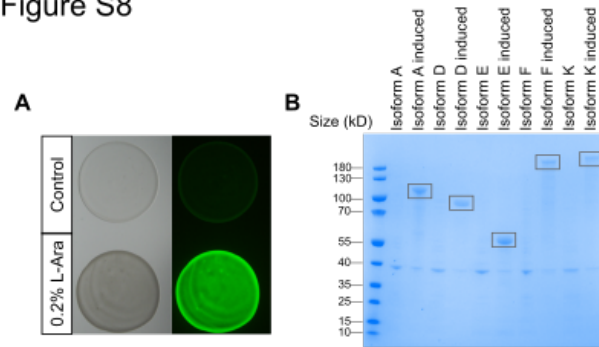

**Additional File 1: Figure S8.** Controls for heterologous expression of proteins in bacteria. **A)** BL21 *E.coli* carrying pDest17 driving expression of GFP are induced by growth in media with 0.2% L-arabinose. Samples of bacteria from liquid cultured were spotted onto LB agar plates for imaging. **B)** A Coomassie stained 4-12% Bis-Tris gel shows expression of *C. elegans* LEA-1 isoforms A, D, E, F, and K in BL21 *E. coli* when induced with 0.2% L-arabinose. 20  $\mu$ g of total protein was loaded per lane.

Figure S9

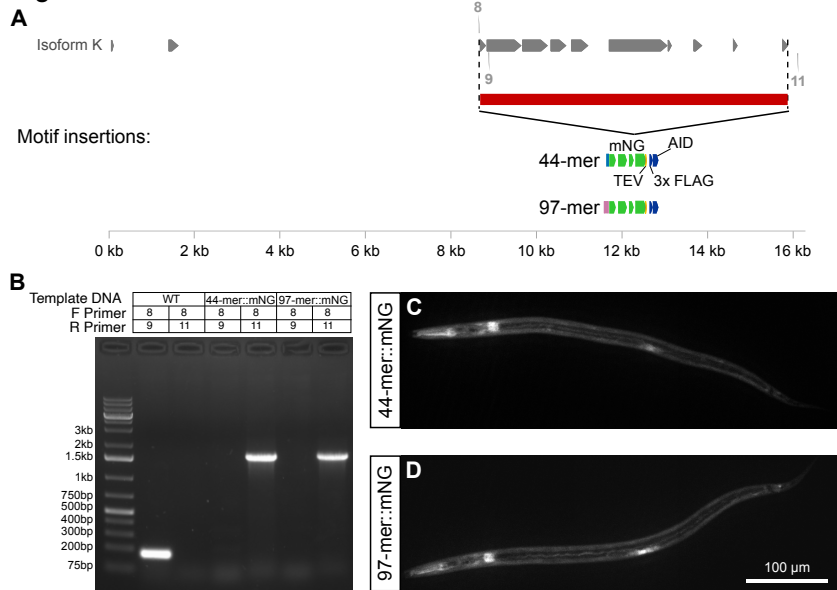

**Additional File 1: Figure S9.** Characterization of LEA-1 motif-expressing worms. **A)** A schematic depicts the regions of genomic deletion and insertions and the primers used for genotyping these edits. **B)** PCR genotyping confirms deletion of the majority of LEA-1 exons and insertion of sequence encoding 44-mer::mNG or 97-mer::mNG. **C)** A representative image depicts *in vivo* expression of the 44-mer::mNG fusion protein in a dauer worm. **D)** A representative image depicts *in vivo* expression of the 97-mer::mNG fusion protein in a dauer worm. Worms in C and D were in a *daf-2* background.

Figure S10

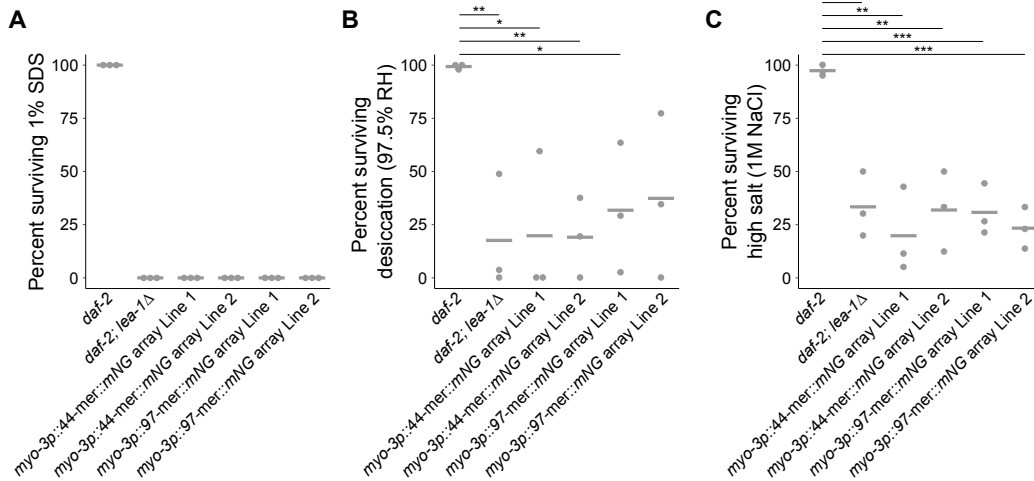

**Additional File 1: Figure S10.** Expression of LEA-1 motifs in body wall muscle does not improve SDS resistance, desiccation tolerance, or osmotic stress survival. **A)** Overexpression array lines carrying *myo-3p::44-mer::mNG* or *myo-3p::97-mer::mNG* transgenes remain sensitive to 1% SDS. **B)** *myo-3p::44-mer::mNG* and *myo-3p::97-mer::mNG* array lines do not rescue 97.5% RH desiccation survival of *daf-2;lea-1Δ* animals. Strains have reduced survival relative to *daf-2* controls (*daf-2;lea-1Δ*  $p=0.006$ , *myo-3p::44-mer::mNG* Line 1  $p=0.02$ , *myo-3p::44-mer::mNG* Line 2  $p=0.002$ , *myo-3p::97-mer::mNG* Line 1  $p=0.02$ , *myo-3p::97-mer::mNG* Line 2  $p=0.05$ ,  $n=3$ , unpaired T-test). None of the array carrying lines is statistically distinguishable from *daf-2;lea-1Δ*. **C)** Muscle-specific expression of LEA-1 motifs does not improve survival of 2 hr osmotic stress in 1M NaCl. Survival of each array carrying line was not significantly different from *daf-2;lea-1Δ*. Rather, strains remain sensitive to 1M NaCl (*daf-2;lea-1Δ*  $p=0.002$ , *myo-3p::44-mer::mNG* Line 1  $p=0.003$ , *myo-3p::44-mer::mNG* Line 2  $p=0.004$ , *myo-3p::97-mer::mNG* Line 1  $p=0.0007$ , *myo-3p::97-mer::mNG* Line 2  $p=0.0002$  vs. *daf-2*,  $n=3$ , unpaired T-test). \* indicates  $p<0.05$ , \*\* indicates  $p<0.01$ , \*\*\* indicates  $p<0.001$ .

**Additional File 1: Table S1.** Genotyping primers for *lea-1* genomic edits.

| Primer number | Sequence                   | Genotyping information                                                                                                                                                              |
|---------------|----------------------------|-------------------------------------------------------------------------------------------------------------------------------------------------------------------------------------|
| 1             | CGATGGTACCACAATGACCA       | For use with primers #2 and #3.                                                                                                                                                     |
| 2             | TTTATGGACATTTAAAGCAAAGGA   | Paired with #1 will give 417 bp band in <i>lea-1</i> Δ but no band in WT.                                                                                                           |
| 3             | TCACTTGAGAGCCCGAACTT       | Paired with #1 will give 742 bp band in WT but no band in <i>lea-1</i> Δ.                                                                                                           |
| 4             | GATCACCATCTCCACCAACC       | Paired with #5 will give 2,569 bp band in <i>lea-1</i> Δ but no band in WT.                                                                                                         |
| 5             | GGGCAATCCAAAAGATTGA        | For use with primers #4, #6, and #7.                                                                                                                                                |
| 6             | ACCCGTTTCTCTTCCCCTAC       | Paired with #5 will give 620 bp band in <i>lea-1</i> Δ but no band in WT.                                                                                                           |
| 7             | GGACACTCTTCGCTCGACTC       | Paired with #5 will give 256 bp band in WT but no band in <i>lea-1</i> Δ.                                                                                                           |
| 8             | CAACAAAATGAGCTTTATGGATAAAG | For use with primer #9.                                                                                                                                                             |
| 9             | ATCTTTTCACCGACGGTGTTG      | Paired with #8 will give 170 bp band in WT and 1,364 bp band in mNG:: <i>lea-1</i> but no band in 44-mer::mNG or 97-mer::mNG.                                                       |
| 10            | ACTTGAAAACCTGGAACCTTCCATC  | For use with primer #11.                                                                                                                                                            |
| 11            | CTACAACAAAGAATTAACAG       | Paired with #10 will give 347 bp band in WT and 1,412 bp band in <i>lea-1</i> ::mYPET. When paired with #8 will give 1,612 bp band in 44-mer::mNG and 1,771 bp band in 97-mer::mNG. |

**Additional File 1: Table S2.** Lifespan analysis of *lea-1* mutants.

| <b>Genotype</b>            | <b>n</b> | <b>Mean Survival (days)</b> | <b>SE</b> | <b>95% CI</b> | <b>Maximum Survival (days)</b> |
|----------------------------|----------|-----------------------------|-----------|---------------|--------------------------------|
| N2                         | 151      | 13.22                       | 0.38      | 12.47 ~ 13.96 | 27                             |
| <i>lea-1(tm6452)</i>       | 150      | 11.94                       | 0.3       | 11.35 ~ 12.53 | 21                             |
| <i>lea-1Δ</i>              | 150      | 13.75                       | 0.42      | 12.91 ~ 14.58 | 27                             |
| <i>daf-2</i>               | 141      | 34.36                       | 1.47      | 31.48 ~ 37.23 | 75                             |
| <i>daf-2;lea-1(tm6452)</i> | 144      | 26.29                       | 1.77      | 22.83 ~ 29.76 | 73                             |
| <i>daf-2;lea-1Δ</i>        | 150      | 36.89                       | 1.56      | 33.84 ~ 39.95 | 73                             |
